# Supplementary material for: Burnout and Job Stress of Anaesthesiologists in The Tertiary-Class A Hospital Northwest China: A Questionnaire Survey
Source: Research Square preprint supplement (doi:10.21203/rs.3.rs-620655/v1), 2021-08-24
Supplement: Supplementary file 1 [file 2d302bba58d0bd84d0d5ccb6.docx]

Supplemental Table 1. Score of Burnout (‾x±s )

| Project |  | Emotion exhaustion | t/F | *P* Value | Depersonaliza-tion | t/F | *P* Value | | Personal accomplishment | | t/F | *P* Value |
| --- | --- | --- | --- | --- | --- | --- | --- | --- | --- | --- | --- | --- |
| All |  | 20.23±3.515 |  |  | 17.98±2.310 |  |  | | 2.43±0.670 |  | |  |
| Gender |  |  |  |  |  |  |  | |  |  | |  |
|  | Male | 20.30±3.603 | 0.357 | 0.721 | 17.90±2.318 | -0.624 | | 0.533 | 2.36±0.699 | -1.837 | | 0.067 |
|  | Female | 20.16±3.445 |  |  | 18.06±2.307 |  |  | | 2.50±0.639 |  | |  |
| Age(y) |  |  |  |  |  |  |  | |  |  | |  |
|  | <25 | 21.17±2.994 | 1.399 | 0.234 | 16.50±1.871 | 19.849 | <0.001 | | 2.67±0.816 | 0.980 | | 0.418 |
|  | 25-30 | 19.96±3.482 |  |  | 16.63±1.837 |  |  | | 2.36±0.674 |  | |  |
|  | 31-35 | 20.97±3.158 |  |  | 17.41±2.066b |  |  | | 2.52±0.714 |  | |  |
|  | 36-45 | 20.06±3.561 |  |  | 18.48±2.239abc |  | |  | 2.39±0.645 |  | |  |
|  | >45 | 19.81±3.866 |  |  | 19.48±2.116abcd |  | |  | 2.48±0.642 |  | |  |
| Education |  |  |  |  |  |  | |  |  |  | |  |
|  | Junior college and below | 19.86±3.536 | 0.605 | 0.612 | 18.95±2.572 | 1.829 | | 0.142 | 2.36±0.658 | 0.638 | | 0.591 |
|  | Undergra-duate | 20.35±3.465 |  |  | 17.98±2.311 |  | |  | 2.42±0.683 |  | |  |
|  | Master | 19.82±3.828 |  |  | 17.57±2.160a |  | |  | 2.55±0.614 |  | |  |
|  | Doctor | 18.67±2.887 |  |  | 18.00±1.000 |  | |  | 2.33±0.577 |  | |  |
| Title |  |  |  |  |  |  | |  |  |  | |  |
|  | Resident physician | 19.67±3.786 | 1.324 | 0.261 | 16.67±2.082 | 10.996 | | <0.001 | 2.33±1.155 | 0.316 | | 0.867 |
|  | Attending doctor | 20.41±3.474 |  |  | 17.03±2.178 |  | |  | 2.41±0.712 |  | |  |
|  | Deputy chief physician | 20.31±3.111 |  |  | 18.17±2.160b |  | |  | 2.42±0.667 |  | |  |
|  | Chief physician | 20.14±4.119 |  |  | 18.95±2.265bc |  | |  | 2.48±0.598 |  | |  |
|  | Resident physician | 17.80±3.676bcd |  |  | 19.50±1.900b |  | |  | 2.60±0.699 |  | |  |
| Working life(y) |  |  |  |  |  |  | |  |  |  | |  |
|  | <5 | 19.76±3.507 | 3.696 | 0.006 | 16.39±1.893 | 23.336 | | <0.001 | 2.42±0.683 | 0.325 | | 0.861 |
|  | 5-10 | 21.10±3.095a |  |  | 17.39±1.938a |  | |  | 2.48±0.714 |  | |  |
|  | 11-20 | 20.64±3.518 |  |  | 18.59±2.279ab |  | |  | 2.38±0.663 |  | |  |
|  | 21-30 | 19.11±3.424bc |  |  | 19.03±1.969ab |  | |  | 2.47±0.638 |  | |  |
|  | >30 | 20.12±4.540 |  |  | 20.00±2.151abc |  | |  | 2.47±0.624 |  | |  |
| Family financial situation |  |  |  |  |  |  | |  |  |  | |  |
|  | Rich | 19.31±4.254 | 1.236 | 0.296 | 18.06±1.526 | 0.160 | | 0.923 | 2.38±0.719 | 0.582 | | 0.627 |
|  | General | 20.07±3.598 |  |  | 17.94±2.333 |  | |  | 2.41±0.662 |  | |  |
|  | Income=  Expenditu-re | 20.80±2.929 |  |  | 18.11±2.225 |  | |  | 2.52±0.687 |  | |  |
|  | Poor | 20.40±4.624 |  |  | 17.70±3.561 |  | |  | 2.40±0.699 |  | |  |
| Physical condition |  |  |  |  |  |  | |  |  |  | |  |
|  | Healthy | 19.33±3.513 | 2.307 | 0.100 | 17.10±2.320 | 6.463 | | 0.002 | 2.52±0.667 | 4.147 | | 0.017 |
|  | Sub-health | 20.33±3.501 |  |  | 18.05±2.270a |  | |  | 2.47±0.647a |  | |  |
|  | Suffer from disease | 20.82±3.486 |  |  | 18.85±2.224a |  | |  | 2.19±0.742a |  | |  |
| Type of hospital |  |  |  |  |  |  | |  |  |  | |  |
|  | Public teaching hospital | 20.32±3.704 | 0.236 | 0.918 | 17.70±2.398 | 0.752 | | 0.557 | 2.49±0.658 | 0.343 | | 0.849 |
|  | Public specialized hospital | 20.22±3.893 |  |  | 18.06±2.402 |  | |  | 2.50±0.614 |  | |  |
|  | Public general hospital | 20.29±3.366 |  |  | 18.12±2.282 |  | |  | 2.41±0.691 |  | |  |
| Anaesthes-iologists / OR |  |  |  |  |  |  | |  |  |  | |  |
|  | >3:1 | 20.14±3.592 | 0.857 | 0.490 | 17.79±1.888 | 1.380 | | 0.240 | 2.14±0.663 | 1.586 | | 0.178 |
|  | 2.5-3:1 | 19.89±3.583 |  |  | 17.61±1.812 |  | |  | 2.29±0.600 |  | |  |
|  | 2-2.5:1 | 19.53±3.577 |  |  | 17.72±2.324 |  | |  | 2.38±0.657 |  | |  |
|  | 1-2:1 | 20.37±3.434 |  |  | 17.98±2.366 |  | |  | 2.47±0.677 |  | |  |
|  | <1 | 20.72±3.790 |  |  | 18.72±2.395c |  | |  | 2.56±0.680a |  | |  |
| Anaesthesiologists / surgeon |  |  |  |  |  |  | |  |  |  | |  |
|  | <0.1 | 21.17±3.766 | 3.334 | 0.020 | 17.85±2.348 | 1.090 | | 0.354 | 2.62±0.527 | 1.701 | | 0.167 |
|  | 0.1-0.2 | 20.40±3.353 |  |  | 18.10±2.200 |  | |  | 2.39±0.726a |  | |  |
|  | 0.21-0.3 | 19.26±3.346ab |  |  | 17.62±2.202 |  | |  | 2.40±0.640b |  | |  |
|  | >0.3 | 20.08±3.752 |  |  | 18.29±2.739 |  | |  | 2.43±0.645 |  | |  |
|  |  |  |  |  |  |  | |  |  |  | |  |
| Operation volume in recent two years | <3000 | 19.85±3.377 | 3.638 | 0.006 | 17.95±2.208 | 4.345 | | 0.002 | 2.45±0.702 | 1.349 | | 0.251 |
|  | 3000-6000 | 20.29±3.725 |  |  | 18.48±2.624 |  | |  | 2.49±0.595 |  | |  |
|  | 6001-12000 | 20.04±3.337 |  |  | 17.69±2.175b |  | |  | 2.34±0.703 |  | |  |
|  | 12001-20000 | 19.08±3.475 |  |  | 16.56.±1.981abc |  | |  | 2.28±0.737 |  | |  |
|  | >20000 | 21.83±3.379abcd |  |  | 18.48±2.010d |  | |  | 2.56±0.616 |  | |  |

Data are presented as mean ± SD. The univariate analysis was performed using *t* test and ANOVA.

Abbreviation: OR, operating room.

*P* value of <0.05 was regarded as statistically significant. Compared with the first group, *aP*＜0.05. Compared with the second group, *bP*＜0.05. Compared with the third group, *cP*＜0.05. Compared with the fourth group, *dP*＜0.05.
