# Supplementary material for: Burnout and Job Stress of Anaesthesiologists in The Tertiary-Class A Hospital Northwest China: A Questionnaire Survey
Source: Research Square preprint supplement (doi:10.21203/rs.3.rs-620655/v1), 2021-08-24
Supplement: Supplementary file 2 [file 64f3500e4dfe36983df11bd2.docx]

Supplemental Table 2. Score of Job stress (‾x±s )

| Project |  | CPSS | t/F | *P* Value |
| --- | --- | --- | --- | --- |
| All |  | 7.51±1.772 |  |  |
| Gender |  |  |  |  |
|  | Male | 7.54±1.712 | 0.314 | 0.754 |
|  | Female | 7.48±1.828 |  |  |
| Age(y) |  |  |  |  |
|  | <25 | 7.83±0.983 | 1.700 | 0.150 |
|  | 25-30 | 7.07±1.549 |  |  |
|  | 31-35 | 7.72±1.825b |  |  |
|  | 36-45 | 7.51±1.806 |  |  |
|  | >45 | 7.72±1.890b |  |  |
| Education |  |  |  |  |
|  | Junior college and below | 7.68±2.378 | 0.159 | 0.924 |
|  | Undergraduate | 7.51±1.699 |  |  |
|  | Master | 7.47±1.916 |  |  |
|  | Doctor | 7.00±1.000 |  |  |
| Title |  |  |  |  |
|  | Resident physician | 7.00±1.732 | 0.520 | 0.721 |
|  | Attending doctor | 7.34±1.696 |  |  |
|  | Deputy chief physician | 7.62±1.778 |  |  |
|  | Chief physician | 7.61±1.886 |  |  |
|  | Resident physician | 7.40±1.838 |  |  |
| Working life(y) |  |  |  |  |
|  | <5 | 7.07±1.658 | 1.834 | 0.122 |
|  | 5-10 | 7.82±1.655 |  |  |
|  | 11-20 | 7.58±1.865 |  |  |
|  | 21-30 | 7.50±1.581 |  |  |
|  | >30 | 7.59±2.599 |  |  |
| Family financial situation |  |  |  |  |
|  | Rich | 7.69±2.522 | 0.186 | 0.906 |
|  | General | 7.47±1.791 |  |  |
|  | Income=  expenditure | 7.54±1.541 |  |  |
|  | Poor | 7.80±1.989 |  |  |
| Physical condition |  |  |  |  |
|  | Healthy | 6.96±2.258 | 4.063 | 0.018 |
|  | Sub-health | 7.55±1.640a |  |  |
|  | Suffer from disease | 8.03±1.723a |  |  |
| Type of hospital |  |  |  |  |
|  | Public teaching hospital | 7.81±1.620 | 0.652 | 0.625 |
|  | Public specialized hospital | 7.46±1.982 |  |  |
|  | Public general hospital | 7.48±1.731 |  |  |
|  |  |  |  |  |
| Anaesthesiologist / OR |  |  |  |  |
|  | >3:1 | 7.14±2.349 | 1.728 | 0.143 |
|  | 2.5-3:1 | 7.36±1.660 |  |  |
|  | 2-2.5:1 | 7.28±1.703 |  |  |
|  | 1-2:1 | 7.49±1.779 |  |  |
|  | <1 | 8.15±1.598cd |  |  |
| Anaesthesiologist / surgeon |  |  |  |  |
|  | <0.1 | 7.72±2.051 | 0.599 | 0.616 |
|  | 0.1-0.2 | 7.55±1.643 |  |  |
|  | 0.21-0.3 | 7.32±1.763 |  |  |
|  | >0.3 | 7.43±1.893 |  |  |
| Operation volume in recent two years |  |  |  |  |
|  | <3000 | 7.34±1.940 | 3.695 | 0.006 |
|  | 3000-6000 | 7.71±1.722 |  |  |
|  | 6001-12000 | 7.29±1.542 |  |  |
|  | 12001-20000 | 6.88±1.536b |  |  |
|  | >20000 | 8.23±1.777acd |  |  |

Data are presented as mean ± SD. The univariate analysis was performed using *t* test and ANOVA.

Abbreviation: OR, operating room, CPSS: Chinese Perceived Stress Scale.

*P* value of <0.05 was regarded as statistically significant. Compared with the first group, *aP*＜0.05. Compared with the second group, *bP*＜0.05. Compared with the third group, *cP*＜0.05. Compared with the fourth group, *dP*＜0.05.
